# Supplementary material for: Assessing Uveitis Risk following Pediatric Down Syndrome Diagnosis: A TriNetX Database Study
Source: MDPI journal article supplement (doi:10.3390/medicina60050710), 2024-04-25
Supplement: s1 [file s1]

|                          |                                                                                              |
|--------------------------|----------------------------------------------------------------------------------------------|
| Supplementary Table S1.  | Diagnostic codes used for our study's inclusion, exclusion criteria as well as comorbidities |
| Supplementary Table S2.  | Diagnostic codes used for our study's outcomes                                               |
| Supplementary Figure S1  | Flow-chart of patient selection                                                              |
| Supplementary Figure S2. | Pictorial representation of the study design                                                 |

| Content                                       | ICD-10-CM                                                               |
|-----------------------------------------------|-------------------------------------------------------------------------|
| <b>Inclusion</b>                              |                                                                         |
| Down syndrome                                 | Q10                                                                     |
| <b>Comorbidities</b>                          |                                                                         |
| Other hypothyroidism                          | E03                                                                     |
| Asthma                                        | J45                                                                     |
| Congenital malformation of heart, unspecified | Q24.9                                                                   |
| Hypertensive diseases                         | I10-I1A                                                                 |
| Atopic dermatitis                             | L20                                                                     |
| Celiac disease                                | K90.0                                                                   |
| Crohn's disease [regional enteritis]          | K50                                                                     |
| Ulcerative colitis                            | K51                                                                     |
| <b>Exclusion</b>                              |                                                                         |
| Viral hepatitis                               | B15–B19                                                                 |
| Human immunodeficiency virus                  | B20, R75, Z21, B97.35                                                   |
| Tuberculosis                                  | A15–A19                                                                 |
| Syphilis                                      | A50–A53                                                                 |
| Rheumatoid arthritis                          | M05–M06                                                                 |
| Systemic lupus erythematosus                  | M32                                                                     |
| Sjogren's syndrome                            | M35.0                                                                   |
| Rheumatic disease                             | M31.6, M33.03, M33.13,<br>M33.2, M33.90, M33.93,<br>M34.0, M34.1, M34.9 |
| Behcet's disease                              | M35.2                                                                   |
| Meniere's disease                             | H81.0                                                                   |
| Sarcoidosis                                   | D86                                                                     |
| Susac syndrome                                | I67.7                                                                   |
| Juvenile arthritis                            | M08                                                                     |

**Supplementary Table S1.** Diagnostic codes used for our study's inclusion, exclusion criteria as well as comorbidities

| Content                     | ICD-10-CM |
|-----------------------------|-----------|
| Iridocyclitis               | H20       |
| Chorio-retinal inflammation | H30       |
| Retinal vasculitis          | H35.06    |
| Pan-uveitis                 | H44.11    |
| Sympathetic uveitis         | H44.13    |

**Supplementary Table S2.** Diagnostic codes used for our study's outcomes

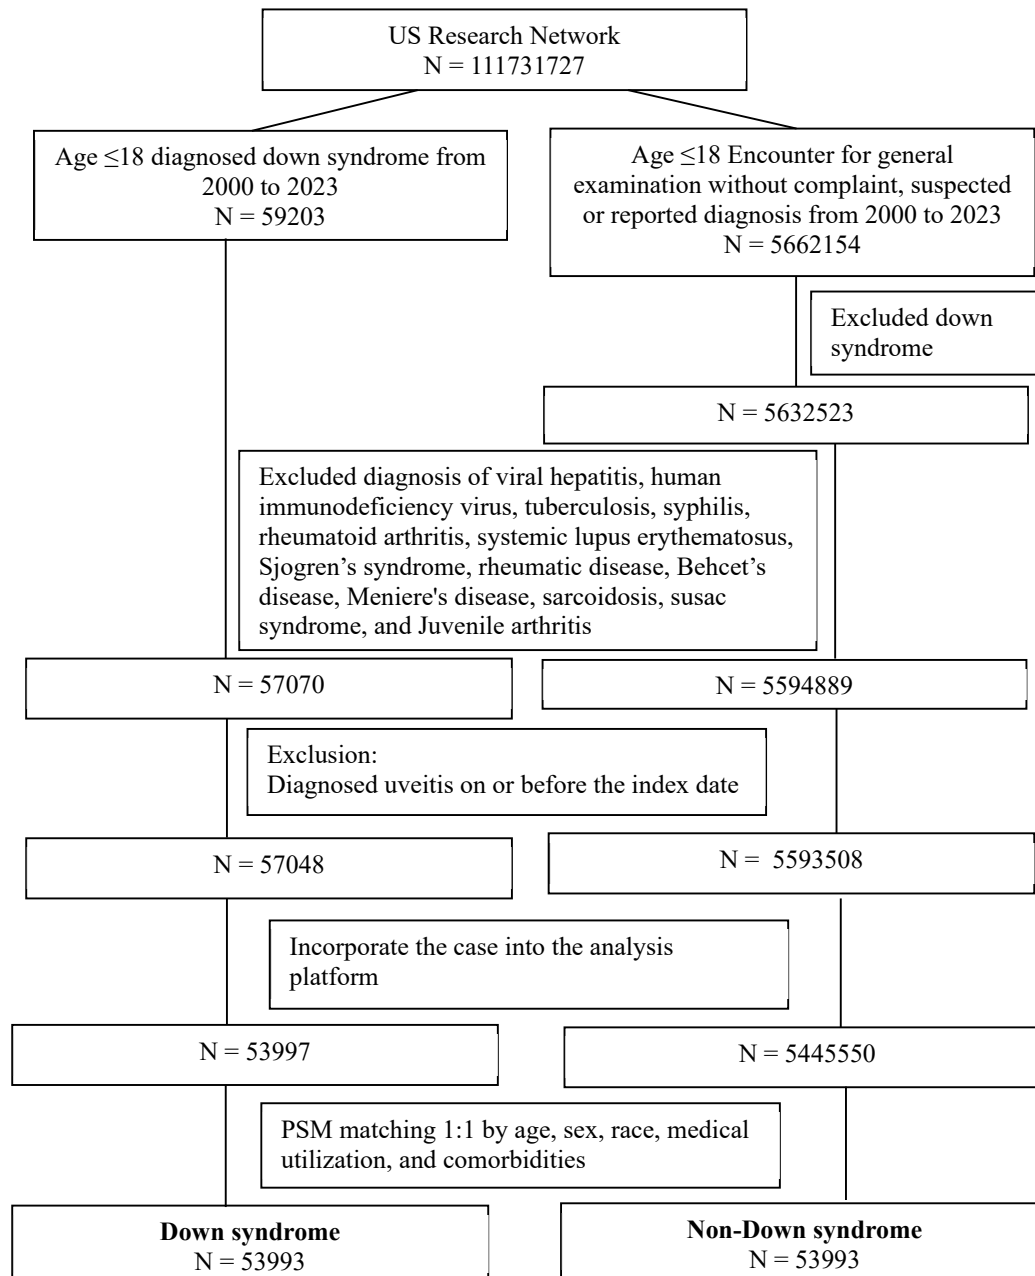

**Supplementary Figure S1** Flow-chart of patient selection

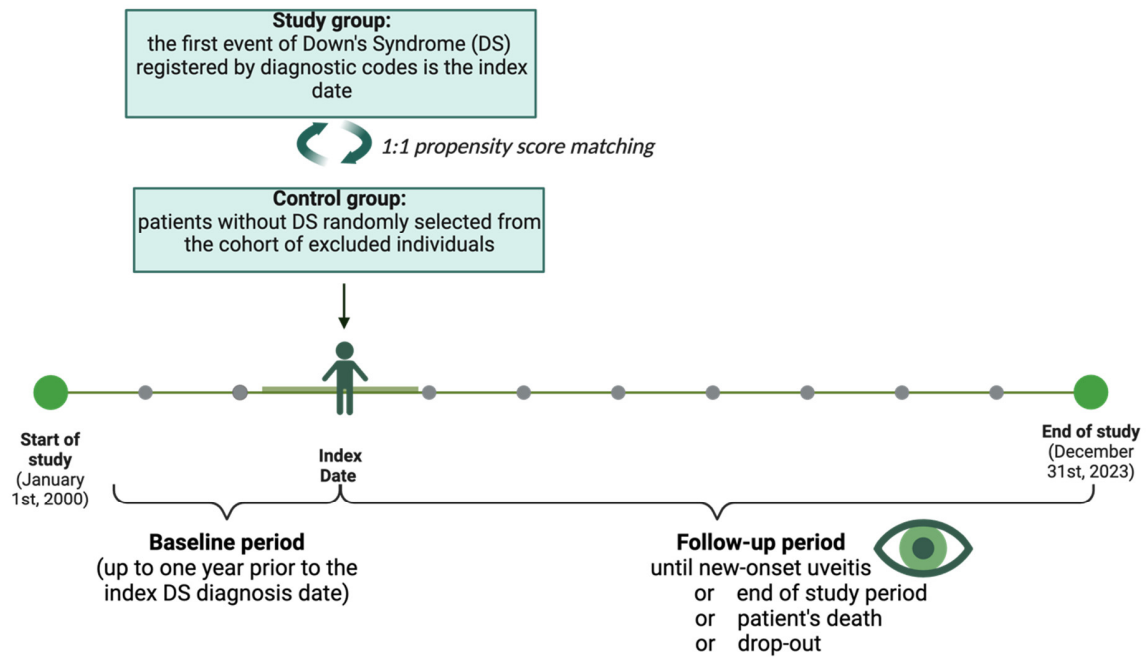

**Supplementary Figure S2.** Pictorial representation of the study design
